# Supplementary material for: A Combination of Coffee Compounds Shows Insulin-Sensitizing and Hepatoprotective Effects in a Rat Model of Diet-Induced Metabolic Syndrome
Source: Nutrients. 2017 Dec 22;10(1):6. doi: 10.3390/nu10010006 (PMC5793234; doi:10.3390/nu10010006)
Supplement: Supplementary file 1 [file nutrients-10-00006-s001.pdf]

**Supplementary Materials:**

**Table S1.** Compound-dependent LC-MS/MS parameters, declustering potential (DP), entrance potential (EP), collision energy (CE) and cell exit potential (CEP).

|                         | Q1 mass | Q3 mass | DP  | EP  | CE  | CEP |
|-------------------------|---------|---------|-----|-----|-----|-----|
| Caffeic acid            | 179.0   | 135.0   | -35 | -10 | -21 | -11 |
| Ferulic acid quantifier | 193.0   | 134.0   | -52 | -10 | -21 | -9  |
| Ferulic acid qualifier  | 193.0   | 178.0   | -52 | -10 | -17 | -15 |
| IS quantifier           | 184.0   | 139.8   | -43 | -10 | -16 | -10 |
| IS qualifier            | 184.0   | 82.8    | -43 | -10 | -22 | -9  |

**Table S2.** Recovery percentile of caffeic and ferulic acid after sample pretreatment at three spiked concentrations: low (0.195 ng/mL), medium (1.56 ng/mL) and high (6.25 ng/mL) ( $n = 5$ ).

|                     | Recovery %  |            |            |
|---------------------|-------------|------------|------------|
|                     | Low         | Medium     | High       |
| <b>Caffeic acid</b> | 69.2 ± 3.6  | 82.9 ± 2.1 | 74.6 ± 1.2 |
| <b>Ferulic acid</b> | 100.7 ± 1.9 | 92.4 ± 1.7 | 88.4 ± 1.0 |
